# Supplementary material
Source: PubMed Central journal article supplement (PMC2615074)

**Supplemental figure 7: The zinc-ribbon domain of Csl4p is required for cytoplasmic**

**exosome-mediated mRNA decay. A.** To investigate what domains of Csl4p are required for exosome-mediated mRNA decay we used the four viable Csl4p truncations in a *his3-nonstop* growth assay. This assay exploits a mutant *HIS3* gene that is missing a stop codon. The resulting aberrant mRNA is rapidly degraded by the cytoplasmic exosome. This results in low levels of His3p, which results in a failure to grow in the absence of histidine<sup>1</sup>. Note that the interpretation of this assay is counter-intuitive: A defect in nonstop mRNA decay results in growth due to stabilization of the *his3-nonstop* mRNA, while normal nonstop mRNA decay result in a failure to grow. The two truncations that are missing the zinc-ribbon domain of Csl4p have a defect in nonstop mRNA decay (*i.e.* allow growth), while the two truncations that have the zinc-ribbon domain of Csl4p do not have a defect in nonstop mRNA decay. Thus, these results confirm that the zinc-ribbon domain is specifically required for cytoplasmic exosome-mediated nonstop mRNA decay. **B.** Yeast contains two general pathways for mRNA decay. One pathway requires Dcp1p (and other proteins), while the alternative pathway requires the cytoplasmic exosome<sup>2,3</sup>. We employed a strain that has a single amino acid change in Csl4p that inactivates cytoplasmic functions of the exosome, but does not affect nuclear functions of the exosome (*cs14-G253E*)<sup>4</sup> combined with a temperature sensitive mutation in *DCP1* (*dcp1-2*). The *dcp1-2 cs14-G253E* double mutant is viable at room temperature because the decapping enzyme is active, but this strain fails to grow at 30°C and above, because both the decapping enzymes and the cytoplasmic exosome are inactive<sup>4</sup>. Growth at 37°C is restored to the *dcp1-2 cs14-G253E* strain upon introduction of either full length Csl4p, or the two viable truncations that contain the zinc-ribbon domain. In contrast, the

two viable truncations that are missing the zinc-ribbon domain do not restore growth at 37°C. These results confirm that the zinc-ribbon domain is required for cytoplasmic exosome-mediated mRNA decay. Importantly, this assay monitors general mRNA decay, and unlike the other two assays is not specific to nonstop mRNA decay<sup>1</sup>. Thus, these results indicate that the zinc-ribbon domain is required for cytoplasmic exosome-mediated decay of both normal and nonstop mRNAs.

1. van Hoof, A., Frischmeyer, P.A., Dietz, H.C. & Parker, R. Exosome-mediated recognition and degradation of mRNAs lacking a termination codon. *Science* **295**, 2262-4. (2002).
2. Jacobs Anderson, J.S. & Parker, R. The 3' to 5' degradation of yeast mRNAs is a general mechanism for mRNA turnover that requires the SKI2 DEVH box protein and 3' to 5' exonucleases of the exosome complex. *EMBO J* **17**, 1497-506. (1998).
3. Johnson, A.W. & Kolodner, R.D. Synthetic lethality of sep1 (xrn1) ski2 and sep1 (xrn1) ski3 mutants of *Saccharomyces cerevisiae* is independent of killer virus and suggests a general role for these genes in translation control. *Mol Cell Biol* **15**, 2719-27. (1995).
4. van Hoof, A., Staples, R.R., Baker, R.E. & Parker, R. Function of the ski4p (Csl4p) and Ski7p proteins in 3'-to-5' degradation of mRNA. *Mol Cell Biol* **20**, 8230-43. (2000).

**A.** *csl4* $\Delta$  + *his3-nonstop* +

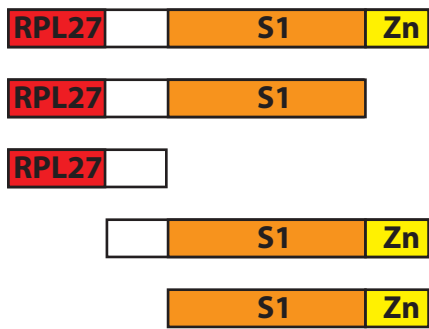

SC-HIS

SC-URA

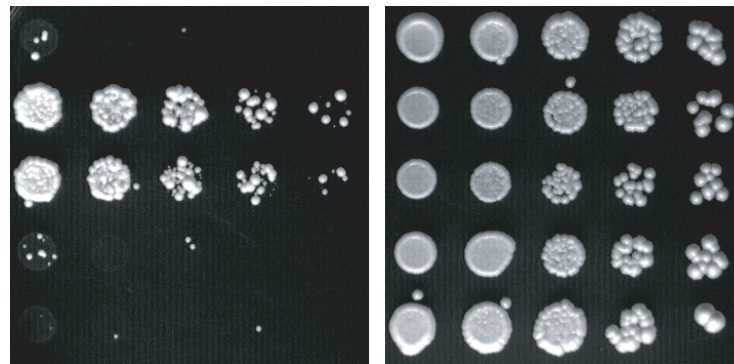

**B.** *dcp1-2 csl4-G253E* +

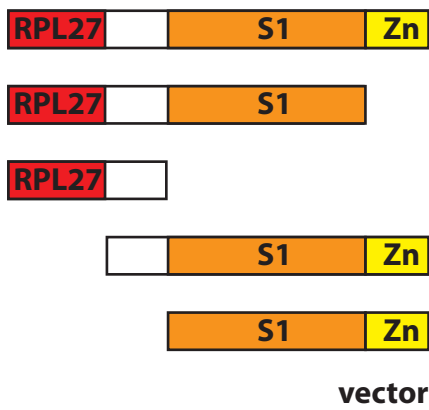

37°C

23°C

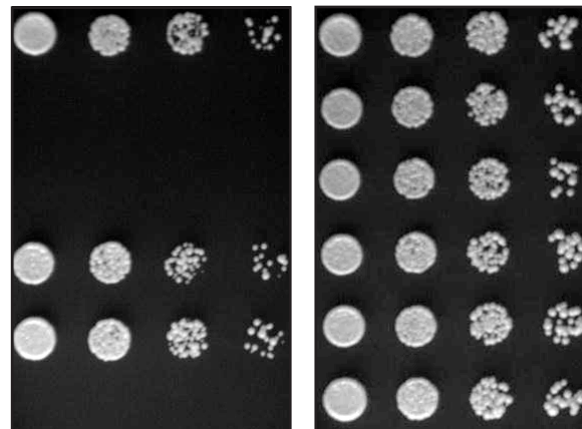

Supplement: NIHMS78951-supplement-7.pdf [file NIHMS78951-supplement-7.pdf]
