# Supplementary material
Source: PubMed Central journal article supplement (PMC2615074)

**Supplemental figure 3: Mutations in the active site of the PIN domain are synthetically lethal with a mutation in the active site of the RNB domain.** **A.** An *rrp44Δ* strain complemented by full length *RRP44* on a plasmid with a *URA3* marker was transformed with *LEU2* plasmids encoding each of the indicated point mutants. Growth on 5FOA indicates that the mutated Rrp44p can carry out the essential function of the exosome. **B.** A *GAL::rrp44* strain was transformed with plasmids encoding each of the indicated point mutants. Growth on glucose containing media indicates that the mutated Rrp44p can carry out the essential function of the exosome.

**A.**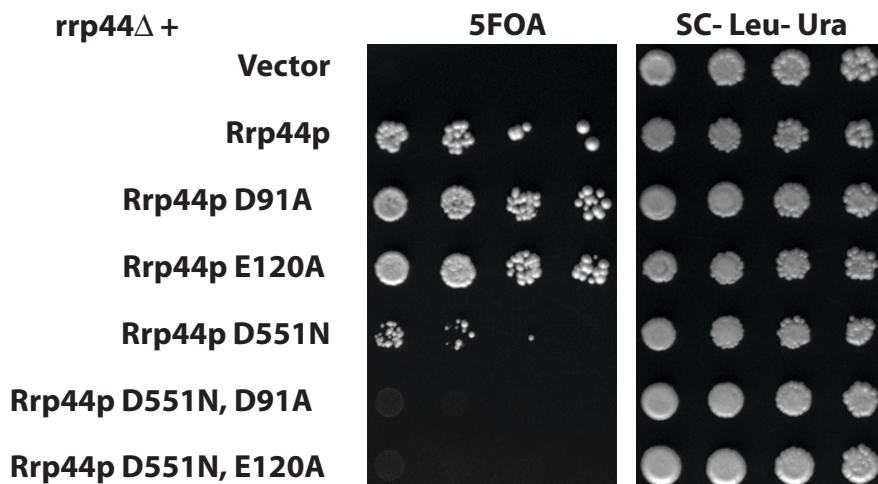**B.**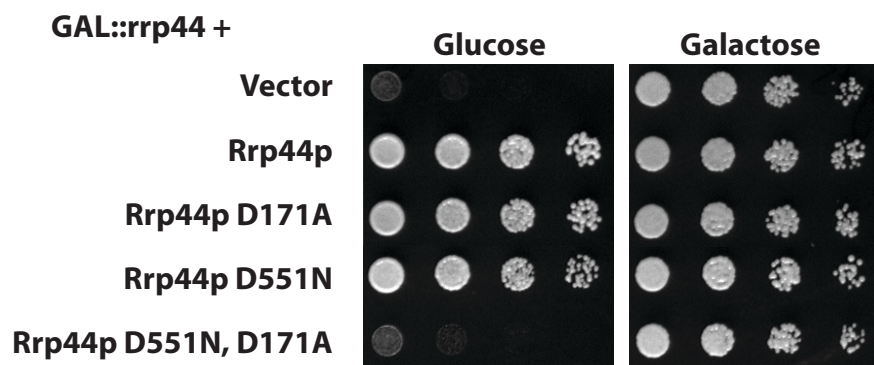

Supplement: NIHMS78951-supplement-3.pdf [file NIHMS78951-supplement-3.pdf]
