# Supplementary material
Source: PubMed Central journal article supplement (PMC2615074)
Supplement: NIHMS78951-supplement-8.pdf [file NIHMS78951-supplement-8.pdf]

| <b>Table 1: Strains used</b> |                                                                           |                             |
|------------------------------|---------------------------------------------------------------------------|-----------------------------|
| <b>Strain Name</b>           | <b>Genotype</b>                                                           | <b>Reference</b>            |
| BY4741                       | <i>MATa, his3Δ1, leu2Δ0, ura3Δ0, met15Δ0</i>                              | Giaever <i>et al.</i> 2002  |
| P79                          | <i>MATa, ade1-100, his4-519, leu2-3,112, ura3-52, GAL10::prot.A-rrp4</i>  | Mitchell <i>et al.</i> 1997 |
| P108                         | <i>MATa, his3Δ200, leu2Δ1, trp1, ura3-52, gal2, galΔ108, GAL10::rrp44</i> | Mitchell <i>et al.</i> 1997 |
| P147                         | <i>MATa, his3Δ200, leu2Δ1, trp1, ura3-52, gal2, galΔ108, GAL10::rrp40</i> | Allmang <i>et al.</i> 1999  |
| P170                         | <i>MATa, his3Δ200, leu2Δ1, trp1, ura3-52, gal2, galΔ108, GAL10::csl4</i>  | Allmang <i>et al.</i> 1999  |
| yAV378                       | <i>MATa, leu2Δ0, trp1Δ, ura3Δ0, dcp1-2::TRP1, ski4-1</i>                  | This study                  |
| yAV856                       | <i>MATa, his3Δ1, leu2Δ0, ura3Δ0, met15Δ0, ski7Δ::NEO</i>                  | This study                  |
| yAV1047                      | <i>MATa, his3Δ1, leu2Δ0, ura3Δ0, met15Δ0, csl4Δ::NEO [CSL4, URA3]</i>     | This study                  |
| yAV1104                      | <i>MATa, his3Δ1, leu2Δ0, ura3Δ0, met15Δ0, rrp4Δ::NEO [RRP4, URA3]</i>     | This study                  |
| yAV1107                      | <i>MATa, his3Δ1, leu2Δ0, ura3Δ0, rrp40Δ::NEO [RRP40, URA3]</i>            | This study                  |
| yAV1115                      | <i>MATa, his3Δ1, leu2Δ0, ura3Δ0, rrp44Δ::NEO [RRP44, URA3]</i>            | This study                  |
| yAV1117                      | <i>MATa, his3Δ1, leu2Δ0, ura3Δ0, met15Δ0, RRP43-myc::HIS3</i>             | This study                  |

| Table 2: Plasmids used |                                                                                                        |        |                               |                 |
|------------------------|--------------------------------------------------------------------------------------------------------|--------|-------------------------------|-----------------|
| Name                   | Description                                                                                            | Marker | Insert                        | Parent plasmid  |
| <b>RRP44 plasmids</b>  |                                                                                                        |        |                               |                 |
| pAV317                 | RRP44 promoter                                                                                         | URA3   | oAV185 and oAV188 PCR         | pRS415          |
| pAV318                 | RRP44 3' flanking region                                                                               | URA3   | oAV189 and oAV186 PCR         | pRS415          |
| pAV344                 | RRP44 promoter, residues 1-1001, RRP44 3' flanking region                                              | LEU2   | oAV185 and oAV186 PCR         | pRS415          |
| pAV363                 | RRP44 promoter, residues 792-909, RRP44 3' flanking region                                             | URA3   | oAV354 and oAV452 PCR         | pAV318          |
| pAV370                 | RRP44 promoter, residues 1-909, RRP44 3' flanking region                                               | LEU2   | Digest pAV363                 | pAV344          |
| pAV331                 | RRP44 promoter, residues 1-440, RRP44 3' flanking region                                               | URA3   | oAV185 and oAV190 PCR         | pAV318          |
| pAV343                 | RRP44 promoter, residues 1-440, RRP44 3' flanking region                                               | LEU2   | Digest pAV331                 | pRS415          |
| pAV364                 | RRP44 promoter, residues 1-474, RRP44 3' flanking region                                               | LEU2   | oAV185 and oAV356 PCR         | pAV343          |
| pAV405                 | RRP44 promoter, residues 1-400, RRP44 3' flanking region                                               | URA3   | oAV185 and oAV472 PCR         | pAV318          |
| pAV423                 | RRP44 promoter, residues 1-400, RRP44 3' flanking region                                               | LEU2   | Digest pAV405                 | pRS415          |
| pAV404                 | RRP44 promoter, residues 1-324, RRP44 3' flanking region                                               | URA3   | oAV185 and oAV470 PCR         | pAV318          |
| pAV422                 | RRP44 promoter, residues 1-324, RRP44 3' flanking region                                               | LEU2   | Digest pAV404                 | pRS415          |
| pAV414                 | RRP44 promoter, residues 1-235, RRP44 3' flanking region                                               | URA3   | oAV185 and oAV468 PCR         | pAV318          |
| pAV454                 | RRP44 promoter, residues 1-235, RRP44 3' flanking region                                               | LEU2   | Digest pAV414                 | pRS415          |
| pAV549                 | RRP44 promoter, residues 84-1001, RRP44 3' flanking region                                             | LEU2   | oAV541 and oAV186 PCR         | pAV341          |
| pAV328                 | RRP44 promoter, residues 360-1001, RRP44 3' flanking region                                            | URA3   | oAV187 and oAV186 PCR         | pAV317          |
| pAV341                 | RRP44 promoter, residues 360-1001, RRP44 3' flanking region                                            | LEU2   | Digest pAV328                 | pRS415          |
| pAV473                 | RRP44 promoter, RRP44 3' flanking region                                                               | URA3   | Digest pAV318                 | pAV317          |
| pAV483                 | RRP44 promoter, residues 1-1001, RRP44 3' flanking region                                              | -      | oAV185 and oAV186 PCR         | pBluescript SK- |
| pAV506                 | RRP44 promoter, residues 1-1001 (C47S, C52S, C55S), RRP44 3' flanking region                           | -      | oAV482 and oAV569 mutagenesis | pAV483          |
| pAV484                 | RRP44 promoter, residues 1-1001 (D91A), RRP44 3' flanking region                                       | -      | oAV570 and oAV571 mutagenesis | pAV483          |
| pAV505                 | RRP44 promoter, residues 1-1001 (E120A), RRP44 3' flanking region                                      | -      | oAV484 and oAV578 mutagenesis | pAV483          |
| pAV485                 | RRP44 promoter, residues 1-1001 (D171A), RRP44 3' flanking region                                      | -      | oAV572 and oAV573 mutagenesis | pAV483          |
| pAV486                 | RRP44 promoter, residues 1-1001 (D198A), RRP44 3' flanking region                                      | -      | oAV574 and oAV575 mutagenesis | pAV483          |
| pAV482                 | RRP44 promoter, residues 360-1001 (D551N), RRP44 3' flanking region                                    | -      | oAV565 and oAV566 mutagenesis | pAV516          |
| pAV523                 | RRP44 promoter, residues 1-324 (D91A), RRP44 3' flanking region                                        | URA3   | oAV185 and oAV470 PCR         | pAV318          |
| pAV525                 | RRP44 promoter, residues 1-324 (D171A), RRP44 3' flanking region                                       | URA3   | oAV185 and oAV470 PCR         | pAV318          |
| pAV526                 | RRP44 promoter, residues 1-324 (D198A), RRP44 3' flanking region                                       | URA3   | oAV185 and oAV470 PCR         | pAV318          |
| pAV524                 | RRP44 promoter, residues 1-324 (E120A), RRP44 3' flanking region                                       | URA3   | oAV185 and oAV470 PCR         | pAV318          |
| pAV522                 | RRP44 promoter, residues 1-324 (C47S, C52S, C55S), RRP44 3' flanking region                            | URA3   | oAV185 and oAV470 PCR         | pAV318          |
| pAV528                 | RRP44 promoter, residues 1-324 (D91A), RRP44 3' flanking region                                        | LEU2   | Digest pAV523                 | pRS415          |
| pAV530                 | RRP44 promoter, residues 1-324 (D171A), RRP44 3' flanking region                                       | LEU2   | Digest pAV525                 | pRS415          |
| pAV531                 | RRP44 promoter, residues 1-324 (D198A), RRP44 3' flanking region                                       | LEU2   | Digest pAV526                 | pRS415          |
| pAV529                 | RRP44 promoter, residues 1-324 (E120A), RRP44 3' flanking region                                       | LEU2   | Digest pAV524                 | pRS415          |
| pAV527                 | RRP44 promoter, residues 1-324 (C47S, C52S, C55S), RRP44 3' flanking region                            | LEU2   | Digest pAV522                 | pRS415          |
| pAV515                 | RRP44 promoter, residues 1-1001 (C47S, C52S, C55S), RRP44 3' flanking region                           | LEU2   | Digest pAV506                 | pRS415          |
| pAV502                 | RRP44 promoter, residues 1-1001 (D91A), RRP44 3' flanking region                                       | LEU2   | Digest pAV484                 | pRS415          |
| pAV514                 | RRP44 promoter, residues 1-1001 (E120A), RRP44 3' flanking region                                      | LEU2   | Digest pAV505                 | pRS415          |
| pAV503                 | RRP44 promoter, residues 1-1001 (D171A), RRP44 3' flanking region                                      | LEU2   | Digest pAV485                 | pRS415          |
| pAV504                 | RRP44 promoter, residues 1-1001 (D198A), RRP44 3' flanking region                                      | LEU2   | Digest pAV486                 | pRS415          |
| pAV501                 | RRP44 promoter, residues 1-1001 (D551N), RRP44 3' flanking region                                      | LEU2   | Digest pAV482                 | pAV344          |
| pAV536                 | RRP44 promoter, residues 1-1001 (C47S, C52S, C55S, D551N), RRP44 3' flanking region                    | LEU2   | Digest pAV515                 | pAV501          |
| pAV537                 | RRP44 promoter, residues 1-1001 (D91A, D551N), RRP44 3' flanking region                                | LEU2   | digest pAV502                 | pAV501          |
| pAV538                 | RRP44 promoter, residues 1-1001 (E120A, D551N), RRP44 3' flanking region                               | LEU2   | Digest pAV514                 | pAV501          |
| pAV539                 | RRP44 promoter, residues 1-1001 (D171A, D551N), RRP44 3' flanking region                               | LEU2   | Digest pAV503                 | pAV501          |
| pAV540                 | RRP44 promoter, residues 1-1001 (D198A, D551N), RRP44 3' flanking region                               | LEU2   | Digest pAV504                 | pAV501          |
| pGEX-4T1               | GST                                                                                                    | -      | -                             | -               |
| pGEX-Rrp44             | GST-RRP44 residues 1-1001                                                                              | -      | GST-44 F and GST-44 R PCR     | pGEX4T1         |
| pGEX-454               | GST-RRP44 residues 1-235                                                                               | -      | GST-44 F and GST-44 R PCR     | pGEX4T1         |
| pAV566                 | GST-RRP44 residues 1-235 (D171A)                                                                       | -      | GST-44 F and oAV648 PCR       | pGEX4T1         |
| pGEX-370               | GST-RRP44 residues 1-990                                                                               | -      | GST-44 F and GST-44 R PCR     | pGEX4T1         |
| <b>CSL4 plasmids</b>   |                                                                                                        |        |                               |                 |
| pAV302                 | CSL4 3' flanking region                                                                                | LEU2   | oAV366 and oAV367 PCR         | pRS415          |
| pAV305                 | CSL4 promoter, residues 1-292, CSL4 3' flanking region                                                 | LEU2   | oAV365 and oAV370 PCR         | pRS415          |
| pAV304                 | CSL4 promoter, residues 1-251, CSL4 3' flanking region                                                 | LEU2   | oAV365 and oAV371 PCR         | pAV302          |
| pAV303                 | CSL4 promoter, residues 1-126, CSL4 3' flanking region                                                 | LEU2   | oAV365 and oAV372 PCR         | pAV302          |
| pAV337                 | CSL4 promoter, residues 1-88, CSL4 3' flanking region                                                  | LEU2   | oAV365 and oAV423 PCR         | pAV305          |
| pAV338                 | CSL4 promoter, residues 1-66, CSL4 3' flanking region                                                  | LEU2   | oAV365 and oAV422 PCR         | pAV305          |
| pAV334                 | CSL4 promoter, residues 65-292, CSL4 3' flanking region                                                | LEU2   | oAV404 and oAV370 PCR         | pAV305          |
| pAV335                 | CSL4 promoter, residues 111-292, CSL4 3' flanking region                                               | LEU2   | oAV405 and oAV370 PCR         | pAV305          |
| pAV336                 | CSL4 promoter, residues 247-292, CSL4 3' flanking region                                               | LEU2   | oAV421 and oAV370 PCR         | pAV305          |
| pAV545                 | CSL4 with Y268A, T270A and W272A mutations                                                             | LEU2   | oAV619 and oAV620 mutagenesis | pAV305          |
| pAV559                 | CSL4 promoter, residues 111-292 with Y268A, T270A and W272A mutations, CSL4 3' flanking region         | LEU2   | oAV619 and oAV620 mutagenesis | pAV335          |
| <b>RRP4 plasmids</b>   |                                                                                                        |        |                               |                 |
| pAV464                 | RRP4 promoter                                                                                          | LEU2   | oAV533 and oAV527 PCR         | pRS415          |
| pAV421                 | RRP4 3' flanking region                                                                                | LEU2   | oAV424 and oAV425 PCR         | pRS415          |
| pAV426                 | RRP4 promoter, residues 1-359, RRP4 3' flanking region                                                 | LEU2   | oAV533 and oAV425 PCR         | pRS415          |
| pAV443                 | RRP4 promoter, residues 1-359, RRP4 3' flanking region                                                 | URA3   | oAV533 and oAV425 PCR         | pRS415          |
| pAV442                 | RRP4 promoter, residues 1-190, RRP4 3' flanking region                                                 | LEU2   | oAV426 and oAV501 PCR         | pAV421          |
| pAV441                 | RRP4 promoter, residues 1-105, RRP4 3' flanking region                                                 | LEU2   | oAV426 and oAV500 PCR         | pAV421          |
| pAV471                 | RRP4 promoter, residues 105-359, RRP4 3' flanking region                                               | LEU2   | oAV528 and oAV425 PCR         | pAV464          |
| pAV472                 | RRP4 promoter, residues 190-359, RRP4 3' flanking region                                               | LEU2   | oAV529 and oAV425 PCR         | pAV464          |
| pAV541                 | RRP4 promoter, residues 1-105, RRP4 3' flanking region                                                 | HIS3   | Digest pAV441                 | pRS413          |
| pAV542                 | RRP4 promoter, residues 1-190, RRP4 3' flanking region                                                 | HIS3   | Digest pAV442                 | pRS413          |
| pAV477                 | RRP4 promoter, TAP                                                                                     | LEU2   | oAV556 and oAV557 PCR         | pAV464          |
| pAV491                 | RRP4 promoter, residues 1-359 TAP, RRP4 3' flanking region                                             | LEU2   | oAV533 and oAV560 PCR         | pAV476          |
| pAV488                 | RRP4 promoter, residues 1-190 TAP, RRP4 3' flanking region                                             | LEU2   | oAV533 and oAV559 PCR         | pAV476          |
| pAV487                 | RRP4 promoter, residues 1-105 TAP, RRP4 3' flanking region                                             | LEU2   | oAV533 and oAV558 PCR         | pAV476          |
| pAV489                 | RRP4 promoter, residues 105-359 TAP, RRP4 3' flanking region                                           | LEU2   | oAV528 and oAV560 PCR         | pAV477          |
| pAV490                 | RRP4 promoter, residues 190-359 TAP, RRP4 3' flanking region                                           | LEU2   | oAV529 and oAV560 PCR         | pAV477          |
| <b>RRP40 plasmids</b>  |                                                                                                        |        |                               |                 |
| pAV465                 | RRP40 promoter                                                                                         | LEU2   | oAV530 and oAV534 PCR         | pRS415          |
| pAV436                 | RRP40 3' flanking region                                                                               | URA3   | oAV430 and oAV431 PCR         | pRS416          |
| pAV461                 | RRP40 promoter, residues 1-240, RRP40 3' flanking region                                               | LEU2   | Digest pAV449                 | pRS415          |
| pAV449                 | RRP40 promoter, residues 1-240, RRP40 3' flanking region                                               | URA3   | oAV530 and oAV431 PCR         | pAV436          |
| pAV460                 | RRP40 promoter, residues 1-140, RRP40 3' flanking region                                               | LEU2   | Digest pAV448                 | pRS415          |
| pAV448                 | RRP40 promoter, residues 1-140, RRP40 3' flanking region                                               | URA3   | oAV432 and oAV507 PCR         | pAV436          |
| pAV459                 | RRP40 promoter, residues 1-65, RRP40 3' flanking region                                                | LEU2   | Digest pAV447                 | pRS415          |
| pAV447                 | RRP40 promoter, residues 1-65, RRP40 3' flanking region                                                | URA3   | oAV432 and oAV506 PCR         | pAV436          |
| pAV466                 | RRP40 promoter, residues 65-240, RRP40 3' flanking region                                              | LEU2   | oAV531 and oAV431 PCR         | pAV465          |
| pAV469                 | RRP40 promoter, residues 65-240, RRP40 3' flanking region                                              | URA3   | Digest pAV466                 | pRS416          |
| pAV467                 | RRP40 promoter, residues 140-240, RRP40 3' flanking region                                             | LEU2   | oAV532 and oAV431             | pAV465          |
| pAV470                 | RRP40 promoter, residues 140-240, RRP40 3' flanking region                                             | URA3   | Digest pAV467                 | pRS416          |
| pAV478                 | RRP40 promoter, TAP                                                                                    | LEU2   | oAV556 and oAV557             | pAV465          |
| pAV496                 | RRP40 promoter, residues 1-240 TAP, RRP40 3' flanking region                                           | LEU2   | oAV534 and oAV563 PCR         | pAV476          |
| pAV493                 | RRP40 promoter, residues 1-140 TAP, RRP40 3' flanking region                                           | LEU2   | oAV534 and oAV562 PCR         | pAV476          |
| pAV492                 | RRP40 promoter, residues 1-65 TAP, RRP40 3' flanking region                                            | LEU2   | oAV534 and oAV561 PCR         | pAV476          |
| pAV494                 | RRP40 promoter, residues 65-240 TAP, RRP40 3' flanking region                                          | LEU2   | oAV531 and oAV563 PCR         | pAV478          |
| pAV495                 | RRP40 promoter, residues 140-240 TAP, RRP40 3' flanking region                                         | LEU2   | oAV532 and oAV563 PCR         | pAV478          |
| <b>Other plasmids</b>  |                                                                                                        |        |                               |                 |
| pAV550                 | RRP4 promoter, residues 1-105, RRP40 residues 65-240, 3' flanking region                               | LEU2   | oAV607 and oAV609 PCR         | pAV487          |
| pAV551                 | RRP4 promoter, residues 1-190, RRP40 residues 140-240, 3' flanking region                              | LEU2   | oAV608 and oAV609 PCR         | pAV488          |
| pAV552                 | RRP40 promoter, residues 1-65, RRP4 residues 105-359, 3' flanking region                               | LEU2   | oAV604 and oAV606 PCR         | pAV492          |
| pAV553                 | RRP40 promoter, residues 1-140, RRP4 residues 190-359, 3' flanking region                              | LEU2   | oAV605 and oAV606 PCR         | pAV493          |
| pAV564                 | RRP4 promoter, residues 1-105, RRP40 residues 65-140, RRP4 residues 190-359, RRP4 3' flanking region   | LEU2   | Digest pAV550                 | pAV553          |
| pAV565                 | RRP40 promoter, residues 1-65, RRP4 residues 105-190, RRP40 residues 140-240, RRP40 3' flanking region | LEU2   | Digest pAV552                 | pAV551          |
| pAV476                 | TAP                                                                                                    | LEU2   | oAV556 and oAV557 PCR         | pRS415          |

**Table 3: Oligonucleotides used**

| PCR oligos             | Sequence                                                                      |
|------------------------|-------------------------------------------------------------------------------|
| oAV185                 | 5' ATATAGAGCTCAAAAACCTGCCTACGTACCATTTAAC                                      |
| oAV186                 | 5' ATATACTCGAGCACCACCAAAATGTCAATTTTTTTG                                       |
| oAV187                 | 5' ATATAACTAGTAAACAACATGTCCAATACCACCGTGATTC                                   |
| oAV188                 | 5' ATATAACTAGTTTTGGCCTGTATGATGCAAG                                            |
| oAV189                 | 5' ATATAACTAGTTAGATGGAAGATGCTTCAGTATC                                         |
| oAV190                 | 5' ATATAACTAGTTTAAACGCCCTTGTCTGATTCAGC                                        |
| oAV354                 | 5' ATATAACTAGTTTAAATCCTCATTACTTGCCCGAC                                        |
| oAV356                 | 5' ATATAACTAGTTTAAATTTGTACCGAGGTCTCTCACAAG                                    |
| oAV365                 | 5' CGCGATCTAGAGGAATFCGAATATGATAGACATCC                                        |
| oAV366                 | 5' GGTATCGATAAGCTTCGGTGGTATTGTAGG                                             |
| oAV367                 | 5' CGCGAGGATCCTATGTAACAGCTTATCTACAGTGC                                        |
| oAV370                 | 5' CGCGAGGATCCTTAAAAGGTTTGGCACATTTGCGCTT                                      |
| oAV371                 | 5' CGCGAGGATCCTTAGTCATTCCTTGCCAGTGGTCAA                                       |
| oAV372                 | 5' CGCGAGGATCCTTAAATAGCATATTTGTTGGTTTTACGAC                                   |
| oAV404                 | 5' CGATGGCATGCAGGTGTGAGGAAGAAAAAACTGATCAGG                                    |
| oAV405                 | 5' CGATGGCATGCCTTCCCTGGGACAGAAAAGGTCGTAAAACC                                  |
| oav421                 | 5' CGATGGCATGCACTGCAAGGAATGACCTTGGGGTCG                                       |
| oAV422                 | 5' CGAGGATCCTTAAACCTCACTGTCCCAACTAGTGTAGC                                     |
| oAV423                 | 5' CGAGGATCCTTATTCCTCTCTGTAGATTGATCAGTGCC                                     |
| oAV424                 | 5' CGCGAGGATCCCAAAAGCCGCTGTTTACACATTTATAAAC                                   |
| oAV425                 | 5' CGCGACTCGAGCTGCTACCTTTGCCAGTGGTAAACC                                       |
| oAV426                 | 5' CGCGATCTAGAGGAATACTGGCAGTGCATTTTTCATGC                                     |
| oAV430                 | 5' CGCGAGGATCCATGGTATAAATAAATATAAACAACATAGAT                                  |
| oAV431                 | 5' CGCGAAGCTTCGTATTAGATATGTGCACTATAGTTGTCCG                                   |
| oAV432                 | 5' CGCGATCTAGAGCGTTATACTGCGTTATACTGCG                                         |
| oAV452                 | 5' CGAGCGCCCGGGTGTGGATCCCGAAGATCC                                             |
| oAV468                 | 5' ATATAACTAGTTTAAATAGAGTCTCTGATGTCGCTGCA                                     |
| oAV470                 | 5' ATATAACTAGTTTATGATTGAGGTAGCAGTTCACGATAAC                                   |
| oAV472                 | 5' ATATAACTAGTTTACCAGGATCTTCTTTGTATATATACAA                                   |
| oAV482                 | 5' GATCGGACATCCCAAGTCTTTCTAGAGTAGTACCAAGAGTCCGCAAATTTGTCG                     |
| oAV484                 | 5' TTGTCCCCAGATTGTTCTAGATGCAGTGAGAAACAAGTC                                    |
| oAV500                 | 5' CGCGAGGATCCTATTAGGCATAACGACCTTTCATGGAATTACCG                               |
| oAV501                 | 5' CGCGAGGATCCTATTACTTTAGAGACCTTGTATGTAAGAGGC                                 |
| oAV506                 | 5' CGCGAGGATCCTAGTTTAAATGTATCTTACTAGAAATAGTCT                                 |
| oAV507                 | 5' CGCGAGGATCCTAGTTTAAAGTTGAGTCAAAACATTTCTATTTCCGGC                           |
| oAV527                 | 5' CGCGATCTAGACGCTTGTGTACTACGCAAGATTAG                                        |
| oAV528                 | 5' CGCGATCTAGAAACAGTATGGCCCCAGAACTGGTGATCACGTCGTAGGG                          |
| oAV529                 | 5' CGCGATCTAGAAACAGATATGAAGTACGGGAAGTTAAGAAACGGG                              |
| oAV530                 | 5' CGCGATCTAGACTCTTGGTTAGTCAAAATGCTGG                                         |
| oAV531                 | 5' CGCGATCTAGACATACAAGATGATTCATCTGTAAACGATTTTGTAAATCG                         |
| oAV532                 | 5' CGCGATCTAGACATACAAGATGACTACAGGACGCGATGCTGGTTTCCGG                          |
| oAV533                 | 5' CGCGAGAGCTCGGAATACTGGCAGTGCATTTT                                           |
| oAV534                 | 5' CGCGAGAGCTCGCGTTATACTGCGTTATACTG                                           |
| oAV541                 | 5' ATATAACTAGTATGGGTAAGCATTACGTCG                                             |
| oAV548                 | 5' TACAGTATATCGAGTTACTACCAAAATGCAGACGACATCAGAGACTCTATTGGTCGACGGATCCCCGGGTT    |
| oAV549                 | 5' CACCACCAAAATGTCAATTTTTTTGCCATTTTCTAAATAGTTTTTCTTCACTTATCGATGAATTCGAGCTCGTT |
| oAV556                 | 5' CGCCTGCAGGTCGACGGATCCCGGGTTAATTAATCCA                                      |
| oAV557                 | 5' CGCAAGCTTTGCCGGTAGAGGTGGTCAATAAGAGCGAC                                     |
| oAV558                 | 5' CGCCTGCAGCGCATAACGACCTTTTCAATGGAATTACCGATAGCA                              |
| oAV559                 | 5' CGCCTGCAGCCTTTAGAGACCTTGTATGTAAGAGGCACT                                    |
| oAV560                 | 5' CGCCTGCAGCGTTGCCGTTACCTCTCATTTTTCGGCGGT                                    |
| oAV561                 | 5' CGCCTGCAGCAATGTATCTCTTACTAGAAATAGTCTATATA                                  |
| oAV562                 | 5' CGCCTGCAGCAGTTGAGTCAAAACATTTCTATTTTCGGCTTC                                 |
| oAV563                 | 5' CGCCTGCAGCCTCCTCTTGACCGTAAGTATTTCTTTAAA                                    |
| oAV565                 | 5' CTCCAGGATGTGTTGATATCAACGATGCCCTACATGCG                                     |
| oAV566                 | 5' CGCATGTAGGGCATCGTTGATATCAACACATCCTGGAG                                     |
| oAV569                 | 5' GCAGAAATTTGCGGACTTGTGTAAGTACTTCTAGAAAGACTTGGGATGTCCGATC                    |
| oAV570                 | 5' GCATTACGTCGCTTTGGCCACCAACGTGGTGTAC                                         |
| oAV571                 | 5' GTAACACCACGTTGGTGGCCAAAGACGATTAATGC                                        |
| oAV572                 | 5' CGATTAATGACAGAAACGCGCGCTATAAGGAAAACCTGTCAATGG                              |
| oAV573                 | 5' CCATGACAGGTTTTCTTATAGCGCGCGTTCGTCTTAATCG                                   |
| oAV574                 | 5' CGTTCTGTTTACCAACGCTCGTTTGAATAGAGAAGC                                       |
| oAV575                 | 5' GCTTCTTATTCAAACGAGCGTTGGTAACAAGAAGC                                        |
| oAV578                 | 5' GACTTGTTCCTCACTGCATCTAGAAACAATCTGGGGGACAA                                  |
| oAV604                 | 5' CGCGACTGCAGCTGCCCGAGAACTGGTGATCAGTCCGTAGG                                  |
| oAV605                 | 5' CGCGACTGCAGCTAAGTACGGGAAGTTAAGAAACGGGATG                                   |
| oAV606                 | 5' CGCGACTGCAGCTGCTACCTTTGCCAGTGGTAAACC                                       |
| oAV607                 | 5' CGCGACTGCAGCTATTCCATCTGTAACGATTTTGTAAATCGG                                 |
| oAV608                 | 5' CGCGACTGCAGCTACTACCGGACCGGATGCTGGTTTCGG                                    |
| oAV609                 | 5' CGCGCTCGAGCGTATTAGATATGTGCACTATAGTTGTCCG                                   |
| oAV648                 | 5' ATATACTCGAGTTAAATAGAGTCTCTGATGTCGCTGCA                                     |
| GST-44 F               | 5' CGCAGAATTCATGTCAGTTCCCGCTATCG                                              |
| GST-44 R               | 5' CCGCTCGAGTATCCTGATACTGAAGCATCTTCC                                          |
| <b>Northern oligos</b> |                                                                               |
| oRP141                 | 5' AATTGATCTATCGAGGAATTC                                                      |
| oRP100                 | 5' GTCTAGCCGCGAGGAAGG                                                         |
| oJA003                 | 5' TGAGAAGGAAATGACGCT                                                         |
| oRP993                 | 5' CGAACGACAAGCCTACTCG                                                        |
